# Supplementary material for: Transethosomal Gel for the Topical Delivery of Celecoxib: Formulation and Estimation of Skin Cancer Progression
Source: MDPI journal article supplement (doi:10.3390/pharmaceutics15010022), 2022-12-21
Supplement: s1 [file s1]

**Table S1:** Kinetic analysis for release of CXB-TES- carbopol 934 hydrogel.

|        | zero     | First    | Diffusion | Peppas   |         |
|--------|----------|----------|-----------|----------|---------|
| a      | 4.464798 | 1.981193 | -1.50307  | 0.850337 |         |
| b      | 0.933486 | -0.00476 | 5.476695  | 2.253622 | chosen  |
| r      | 0.97343  | -0.98105 | 0.998015  | 0.853522 | "r"     |
| k      | 0.933486 | -0.01097 | 5.476695  | 2.253622 | 0.99801 |
| t(1/2) | 53.56266 | -63.1547 | 83.34948  |          |         |

**Table S2:** Kinetic analysis for release of CXB-TES- HPMC hydrogel.

|        | zero     | First    | Diffusion | Peppas   |          |
|--------|----------|----------|-----------|----------|----------|
| a      | 6.833925 | 1.970335 | -0.13182  | 0.850337 |          |
| b      | 1.042397 | -0.00552 | 6.252248  | 2.253622 | chosen   |
| r      | 0.94881  | -0.96237 | 0.994499  | 0.853522 | "r"      |
| k      | 1.042397 | -0.01272 | 6.252248  | 2.253622 | 0.994499 |
| t(1/2) | 47.96635 | -54.4955 | 63.95398  |          |          |

**Table S3:** Korsmeyer-Peppas Kinetic analysis for release of CXB-TES- HPMC hydrogel.

|            |             |          |                    |          |
|------------|-------------|----------|--------------------|----------|
| <b>0.5</b> | <b>3.21</b> |          | 0.506730618        | -0.30103 |
| <b>1</b>   | 5.41        |          | 0.73325471         | 0        |
| <b>2</b>   | 9.01        |          | 0.954960288        | 0.30103  |
| <b>3</b>   | 11.12       |          | 1.04595436         | 0.477121 |
| <b>4</b>   | 13.35       |          | 1.125602814        | 0.60206  |
| <b>6</b>   | 15.33       |          | 1.185559517        | 0.778151 |
| <b>12</b>  | 22.70       |          | 1.356113896        | 1.079181 |
| <b>24</b>  | 29.25       |          | 1.466198515        | 1.380211 |
|            |             | <b>n</b> | <b>0.568018281</b> |          |
|            |             | <b>r</b> | <b>0.991086837</b> |          |

**Table S4:** Korsmeyer-Peppas Kinetic analysis for release of CXB-TES- carbapol hydrogel.

|            |             |          |                    |          |
|------------|-------------|----------|--------------------|----------|
| <b>0.5</b> | <b>2.67</b> |          | 0.426402661        | -0.30103 |
| <b>1</b>   | 3.90        |          | 0.591433759        | 0        |
| <b>2</b>   | 6.20        |          | 0.792141842        | 0.30103  |
| <b>3</b>   | 7.57        |          | 0.878899173        | 0.477121 |
| <b>4</b>   | 9.83        |          | 0.99250386         | 0.60206  |
| <b>6</b>   | 11.20       |          | 1.049179786        | 0.778151 |
| <b>12</b>  | 18.27       |          | 1.261646219        | 1.079181 |
| <b>24</b>  | 25.10       |          | 1.399617327        | 1.380211 |
|            |             |          |                    |          |
|            |             | <b>n</b> | <b>0.589525475</b> |          |
|            |             | <b>r</b> | <b>0.998385892</b> |          |

**Table S5:** Visual score of DNA damage in normal skin cell lines treated with different CXB preparations.

| Treatment                           | No. of cells  |           |        | Class** |    |    |    | DNA damaged cells %<br>(Mean±SEM) |
|-------------------------------------|---------------|-----------|--------|---------|----|----|----|-----------------------------------|
|                                     | No of samples | Analyzed* | Comets | 0       | 1  | 2  | 3  |                                   |
| Normal cells (-ve)                  | 5             | 500       | 34     | 466     | 29 | 5  | 0  | 6.82±0.86 <sup>c</sup>            |
| (-ve)+TES suspension                | 5             | 500       | 93     | 407     | 32 | 25 | 36 | 18.84±1.28 <sup>b</sup>           |
| (-ve)+Blank HPMC gel                | 5             | 500       | 38     | 462     | 30 | 6  | 2  | 7.61±0.51 <sup>c</sup>            |
| (-ve)+CXB gel                       | 5             | 500       | 46     | 454     | 28 | 11 | 7  | 9.22±0.58 <sup>c</sup>            |
| (-ve)+CXB-TES gel                   | 5             | 500       | 87     | 413     | 31 | 23 | 33 | 17.44±1.03 <sup>b</sup>           |
| (-ve)+ CXB powder                   | 5             | 500       | 118    | 382     | 37 | 33 | 48 | 23.63±0.93 <sup>a</sup>           |
| Normal cells +<br>Doxorubicin (+ve) | 5             | 500       | 107    | 393     | 34 | 29 | 44 | 21.41±0.75 <sup>ab</sup>          |

**Table S6:** Visual score of DNA damage in skin cancer cell lines treated with different CXB preparations.

| Treatment                          | No. of cells  |           |        | Class** |    |    |    | DNA damaged cells %<br>(Mean±SEM) |
|------------------------------------|---------------|-----------|--------|---------|----|----|----|-----------------------------------|
|                                    | No of samples | Analyzed* | Comets | 0       | 1  | 2  | 3  |                                   |
| Skin cancer (-ve)                  | 5             | 500       | 56     | 444     | 28 | 13 | 15 | 11.21±0.87 <sup>d</sup>           |
| (-ve)+TES suspension               | 5             | 500       | 117    | 383     | 39 | 33 | 45 | 23.43±0.93 <sup>ab</sup>          |
| (-ve)+Blank HPMC gel               | 5             | 500       | 69     | 431     | 31 | 17 | 21 | 13.82±0.66 <sup>cd</sup>          |
| (-ve)+CXB gel                      | 5             | 500       | 81     | 419     | 35 | 20 | 26 | 16.23±1.07 <sup>c</sup>           |
| (-ve)+CXB-TES gel                  | 5             | 500       | 107    | 393     | 34 | 31 | 42 | 21.41±0.51 <sup>b</sup>           |
| (-ve)+CXB powder                   | 5             | 500       | 138    | 362     | 33 | 42 | 63 | 27.63±1.21 <sup>a</sup>           |
| Skin cancer +<br>Doxorubicin (+ve) | 5             | 500       | 124    | 376     | 32 | 38 | 54 | 24.82±0.80 <sup>ab</sup>          |

\*: Number of cells examined per a group, \*\*: Class 0= no tail; 1= tail length < diameter of nucleus; 2= tail length between 1X and 2X the diameter of nucleus; and 3= tail length > 2X the diameter of nucleus. Data are presented as mean ± SD. <sup>a,b,c</sup>: Mean values within tissue with unlike superscript letters were significantly different ( $p \leq 0.05$ ; ANOVA/Tukey).

**Table S7:** DNA fragmentation detected in normal skin cell lines.

| Treatment                        | DNA Fragmentation (%)         |
|----------------------------------|-------------------------------|
|                                  | Mean $\pm$ SEM                |
| Normal cells (-ve)               | 8.1 $\pm$ 0.24 <sup>d</sup>   |
| (-ve)+TES suspension             | 20.6 $\pm$ 0.56 <sup>b</sup>  |
| (-ve)+Blank HPMC gel             | 15.2 $\pm$ 0.30 <sup>c</sup>  |
| (-ve)+CXB gel                    | 17.1 $\pm$ 0.23 <sup>bc</sup> |
| (-ve)+CXB-TES gel                | 19.4 $\pm$ 0.48 <sup>b</sup>  |
| (-ve)+ CXB powder                | 27.6 $\pm$ 0.54 <sup>a</sup>  |
| Normal cells + Doxorubicin (+ve) | 21.7 $\pm$ 0.66 <sup>b</sup>  |

Means with different superscripts (<sup>a, b, c, d</sup>) between treatments in the same column are significantly different at  $p \leq 0.05$ ; ANOVA/Tukey.

**Table S8:** DNA fragmentation detected in cancer skin cell lines.

| Treatment                       | DNA Fragmentation (%)         |
|---------------------------------|-------------------------------|
|                                 | Mean $\pm$ SEM                |
| Skin cancer (-ve)               | 13.7 $\pm$ 0.45 <sup>f</sup>  |
| (-ve)+TES suspension            | 35.5 $\pm$ 0.58 <sup>b</sup>  |
| (-ve)+Blank HPMC gel            | 17.9 $\pm$ 0.15 <sup>e</sup>  |
| (-ve)+CXB gel                   | 21.2 $\pm$ 0.66 <sup>d</sup>  |
| (-ve)+CXB-TES gel               | 31.6 $\pm$ 0.61 <sup>c</sup>  |
| (-ve)+CXB powder                | 43.7 $\pm$ 0.53 <sup>a</sup>  |
| Skin cancer + Doxorubicin (+ve) | 33.8 $\pm$ 0.48 <sup>bc</sup> |

Means with different superscripts (<sup>a, b, c, d, e, f</sup>) between treatments in the same column are significantly different at  $p \leq 0.05$ ; ANOVA/Tukey.
